# Supplementary material for: Undergraduate Students Sugar Dating in the US Demonstrate Increased Financial Need and a History of Several Adverse Childhood Experiences
Source: Research Square preprint supplement (doi:10.21203/rs.3.rs-3171711/v1), 2023-07-20
Supplement: Supplementary file 1 [file 6ba8477aa1c346db5717a876.docx]

| **Table 2. Sugar Dating Practices** | | | |
| --- | --- | --- | --- |
|  | **Exposed N** | **Frequency** | **%** |
| **Past vs current/ongoing participation in sugar dating**  Current  Past Only | 82 | 19  63 | 23.2  76.8 |
| **Length of participation in sugar dating**  < 1 month  1-5 months  6 months to 1 year  > 1 year  Prefer not to answer | 82 | 32  26  11  8  5 | 39.0  31.7  13.4  9.8  6.1 |
| **Number of sugar relationships**  1  2  3  4  5  More than 5  Don’t Know  Prefer not to answer | 82 | 36  20  8  2  1  3  5  7 | 43.9  24.4  9.8  2.4  1.2  3.7  6.1  8.5 |
| **Sugar sponsor gender**  Cis-Man  Cis-Woman  Trans-Man  Trans-Woman  Other  More than one of the previous options  Prefer not to answer | 82 | 64  5  2  1  2  3  5 | 78.1  6.1  2.4  1.2  2.4  3.7  6.1 |
| **Sugar sponsor age***  Under 18  18-25  25-29  30-39  40-49  50-59  60-69  70-79  80 or Older  Don’t Know  Prefer not to answer | 82 | 0  9  11  30  25  19  12  4  1  7  1 | 0.0  11.0  13.4  36.6  30.5  23.2  14.6  4.9  1.2  8.5  1.2 |
| **Sexual acts part of any sugar relationships**  Yes  No  Prefer not to answer | 82 | 39  34  9 | 47.6  41.5  11.0 |
| **Method of finding sugar sponsors/ clients***  Online website specific to sugar dating  General dating app  Bar/club/restaurant  Mutual friend/ acquaintance  Social Media  Work  Online Website for Escorts  Schools  Kik  Prefer not to answer | 82 | 48  21  12  9  3  3  1  1  1  7 | 58.5  25.6  14.6  11.0  3.7  3.7  1.2  1.2  1.2  8.5 |
| **Paying job outside of sugar dating (while sugar dating)**  Yes  No  Prefer not to answer | 82 | 51  24  7 | 62.2  29.3  8.5 |
| **Incentives for sugar dating participation***  Extra Money (not for essential items but for extra)  Financial (eg. needed the money for something essential, like food or tuition)  Experimentation  Excitement  Sex  Romantic Relationship  Networking/Business  I had no incentive or reason  Prefer not to Answer | 82 | 55  38  21  21  15  12  11  1  6 | 67.1  46.3  25.6  25.6  18.3  14.6  13.4  1.2  7.3 |
| **Gifts, money or other compensation received from sugar sponsor(s)**  Yes  No  Prefer not to Answer | 82 | 70  8  4 | 85.4  9.8  4.9 |
| **Types of compensation received***  Money  Gift(s)  Food  Housing  Vacation  Prefer not to Answer | 70 | 57  36  29  7  1  2 | 81.4  51.4  41.4  10.0  1.4  2.4 |
| **What money was spent on***  Food  Clothes/shoes/accessories  Luxury Items (bags, clothing, shoes, etc.)  Tuition  Recreational Drugs  Rent  Trips/Vacations  Healthcare  Other (saved, donated to club fundraiser)  Prefer not to Answer | 57 | 39  33  21  12  11  11  10  4  2  2 | 68.4  57.9  36.8  21.1  19.3  19.3  17.5  7.0  3.5  3.5 |
| **Average/typical monetary payment for a single date ($)** | 45 | Mean: 625.44  SD: 919.2  Median: 350  Range: 3950  IQR: 300 |  |
| **Lowest monetary payment received for a date ($)** | 40 | Mean: 435.68  SD: 869.5  Median: 125  Range: 3993  IQR: 377.5 |  |
| **Highest monetary payment received for a date ($)** | 42 | Mean: 1062.38  SD: 1411.1  Median: 500  Range: 6450  IQR: 700 |  |
| **Verbal or written contract of relationship parameters created**  Yes  No  For some Sugar Relationships but Not Others  Prefer Not to Answer | 82 | 20  38  12  12 | 24.4  46.3  14.6  14.6 |
| **Verbal or written contract**  Verbal  Written  Depends on the Relationship  Other | 32 | 21  8  2  1 | 65.6  25.0  6.3  3.1 |
| **Contract terms created by:**  Both  Sugar Sponsor  Participant (Sugar Baby)  Not Sure | 32 | 21  6  4  1 | 65.6  18.8  12.5  3.1 |
| *Adds up to more than 100% because participants could select more than one option | | | |
