# Supplementary material for: Undergraduate Students Sugar Dating in the US Demonstrate Increased Financial Need and a History of Several Adverse Childhood Experiences
Source: Research Square preprint supplement (doi:10.21203/rs.3.rs-3171711/v1), 2023-07-20
Supplement: Supplementary file 2 [file c513fbef7e350108f8a2ef02.docx]

| **Table 3. Finances (N=1,582)** | | | | | |
| --- | --- | --- | --- | --- | --- |
|  | **Exposed (n=82)** | | **Control (n=1,500)** | | **p-value** |
| **Freq** | **%** | **Freq** | **%** |
| **How concerned are you that you will have sufficient funds to complete college?**  Very Confident  Somewhat Confident  Neutral  Somewhat Unconfident  Very Unconfident  Prefer not to Answer | 32  21  2  13  7  7 | 39.0  25.6  2.4  15.9  8.5  8.5 | 562  408  133  221  79  97 | 37.5  27.2  8.9  14.7  5.3  6.5 | 0.30 |
| **Total anticipated educational debt by the time you receive your current degree?**  None  $1-9,999  $10,000 - 49,999  $50,000 or more  Don’t Know  Prefer not to Answer | 22  5  22  18  4  11 | 26.8  6.1  26.8  22.0  4.9  13.4 | 601  83  262  222  183  149 | 40.1  5.5  17.5  14.8  12.2  9.9 | **0.01**  0.32  **0.01**  **0.01**  0.34  0.06 |
| **Participant financially supported by a parent/guardian for:**  Any Expense  Tuition  Other Educational Expenses (e.g. books)  Housing and Food  Health Insurance  Personal Spending  Other Expenses | 73  61  54  57  58  38  18 | 89.0  74.4  65.9  69.5  70.7  46.3  22.0 | 1,347  1,122  1,015  1,112  1,177  815  454 | 89.8  74.8  67.7  74.1  78.5  54.3  30.3 | 0.82  0.93  0.73  0.35  0.10  0.16  0.11 |
| **Participant uses loans for:**  Any Expenses  Tuition  Other Educational Expenses (e.g. books)  Housing and Food  Health Insurance  Personal Spending  Other Expenses | 38  31  9  12  5  2  1 | 46.3  37.8  11.0  14.6  6.1  2.4  1.2 | 458  423  116  171  48  18  16 | 30.5  28.2  7.7  11.4  3.2  1.2  1.1 | **0.00**  0.06  0.29  0.37  0.16  0.33  0.90 |
| **Participant receives scholarship for:**  Any Expenses  Tuition  Other Educational Expenses (e.g. books)  Housing and Food  Health Insurance  Personal Spending  Other Expenses | 51  43  12  10  7  2  0 | 62.2  52.4  14.6  12.2  8.5  2.4  0.0 | 700  676  161  156  49  35  19 | 46.7  45.1  10.7  10.4  3.3  2.3  1.3 | **0.01**  0.19  0.27  0.61  **0.01**  0.95  0.31 |
| **Participant receives Federal Pell Grant for:**  Any Expenses  Tuition  Other Educational Expenses (e.g. books)  Housing and Food  Health Insurance  Personal Spending  Other Expenses | 28  21  8  11  2  1  0 | 34.1  25.6  9.8  13.4  2.4  1.2  0.0 | 273  253  61  66  15  8  4 | 18.2  16.9  4.1  4.4  1.0  0.5  0.3 | **0.00**  **0.04**  **0.01**  **0.00**  0.22  0.42  0.64 |
| **Participant receives financial support from work study for:**  Any Expenses  Tuition  Other Educational Expenses (e.g. books)  Housing and Food  Health Insurance  Personal Spending  Other Expenses | 28  19  6  7  4  7  2 | 34.1  23.2  7.3  8.5  4.9  8.5  2.4 | 299  157  78  69  11  161  45 | 19.9  10.5  5.2  4.6  0.7  10.7  3.0 | **0.00**  **0.00**  0.41  0.11  **0.00**  0.53  0.77 |
| **Participant works (non-work study) to finance:**  Any Expenses  Tuition  Other Educational Expenses (e.g. books)  Housing and Food  Health Insurance  Personal Spending  Other Expenses | 40  13  20  22  6  29  10 | 48.8  15.9  24.4  26.8  7.3  35.4  12.2 | 537  88  159  195  29  479  133 | 35.8  5.9  10.6  13.0  1.9  31.9  8.9 | **0.02**  **0.00**  **0.00**  **0.00**  **0.00**  0.52  0.31 |
| **Participant financially supported by donor (individual not related to participant) for**  Any Expense  Tuition  Other Educational Expenses (e.g. books)  Housing and Food  Health Insurance  Personal Spending  Other Expenses | 8  2  1  3  3  2  2 | 9.8  2.4  1.2  3.7  3.7  2.4  2.4 | 57  37  18  9  4  7  4 | 3.8  2.5  1.2  0.6  0.3  0.5  0.3 | **0.01**  0.99  0.99  **0.00**  **0.00**  **0.02**  **0.00** |
| **Participant financially supported by relative for**  Any Expense  Tuition  Other Educational Expenses (e.g. books)  Housing and Food  Health Insurance  Personal Spending  Other Expenses | 20  9  8  6  2  5  1 | 24.4  11.0  9.8  7.3  2.4  6.1  1.2 | 247  116  67  72  18  121  38 | 16.5  7.7  4.5  4.8  1.2  8.1  2.5 | 0.06  0.29  **0.03**  0.30  0.33  0.52  0.46 |
