# Supplementary material for: Undergraduate Students Sugar Dating in the US Demonstrate Increased Financial Need and a History of Several Adverse Childhood Experiences
Source: Research Square preprint supplement (doi:10.21203/rs.3.rs-3171711/v1), 2023-07-20
Supplement: Supplementary file 3 [file f6c53140ce43c2d4eed7f280.docx]

| **Table 4. Trauma, Mental Health, and Substance Use** | | | | | | | |
| --- | --- | --- | --- | --- | --- | --- | --- |
|  | **Total N** | **Exposed (n=82)** | | **Control (n=1,500)** | | **p-value** | **Odds Ratio (more likely to be Exposed)** |
|  | **Freq** | **%** | **Freq** | **%** |
| **NIDA: Daily/almost daily Daily Alcohol Use (past year)**  Yes  No  No Response | 1582 | 4  71  7 | 4.9  86.6  8.5 | 18  1383  99 | 1.2  92.2  6.6 | **0.00** | **4.33** |
| **NIDA: Daily Cigarette Use (past year)**  Yes  No  No Response | 1582 | 5  68  9 | 6.1  82.9  11.0 | 49  1349  102 | 3.3  89.9  6.8 | 0.139 | **2.02** |
| **NIDA: E-cigarettes (past year)**  Yes  No  No Response | 1582 | 13  62  7 | 15.9  75.6  8.5 | 109  1284  107 | 7.3  85.6  7.1 | **0.00** | **2.47** |
| **NIDA: prescription drugs for non-medical reasons**  Yes  No  No Response | 1582 | 2  71  9 | 2.4  86.6  11.0 | 12  1377  111 | 0.8  91.8  7.4 | 0.11 | **3.23** |
| **NIDA: illegal drugs**  Yes  No  No Response | 1582 | 10  64  8 | 12.2  78.0  9.8 | 55  1339  106 | 3.7  89.3  7.1 | **0.00** | **3.80** |
| **PHQ-9 (Patient Health Questionnaire-9) score (based on past 2 weeks)** | 1377 | n = 70  Mean: 10.1  SD: 7.44  Median: 9  Range: 27  IQR: 9 |  | n = 1307  Mean: 7.04  SD: 5.45  Median: 6  Range: 27  IQR: 7 |  | **0.00** |  |
| **PHQ-9 Score of 15 or more**  Yes  No  No Response | 1582 | 1171  136  193 | 78.1  9.1  12.9 | 53  17  12 | 64.6  20.7  14.6 | **0.00** | **2.76** |
| **GAD-7 (General Anxiety Disorder-7) score**  **(based on past 2 weeks)** | 1366 | n = 69  Mean: 7.71  SD: 5.67  Median: 7  Range: 21  IQR: 8 |  | n = 1297  Mean: 6.13  SD: 5.27  Median: 5  Range: 21  IQR: 7 |  | **0.02** |  |
| **GAD-7 Score of 10 or more**  Yes  No  No Response | 1582 | 21  48  13 | 25.6  58.5  15.9 | 307  990  203 | 20.5  66.0  13.5 | 0.21 | 1.41 |
| **ACE (Adverse Childhood Experiences Questionnaire) score** | 1442 | n = 70  Mean: 3.4  SD: 2.53  Median: 3  Range: 10  IQR: 4 |  | n = 1372  Mean: 1.56  SD: 1.84  Median: 1  Range: 10  IQR: 2.5 |  | **0.00** |  |
| **ACE score of 4 or more**  Yes  No  No Response | 1582 | 32  38  12 | 39.0  46.3  14.6 | 209  1163  128 | 13.9  77.5  8.5 | **0.00** | **2.02** |
| **[Q1] [during first 18 years of life] Did a parent or other adult in the household often swear at you, insult you, put you down, or humiliate you? OR act in a way that made you afraid that you might be physically hurt?**  Yes  No  No Response | 1582 | 38  35  9 | 46.3  42.7  11.0 | 419  963  118 | 27.9  64.2  7.9 | **0.00** | **2.50** |
|  |  |
|  |  |
|  |  |
| **[Q2] [during first 18 years of life] Did a parent or other adult in the household often push, grab, slap, or throw something at you? OR ever hit you so hard that you had marks or were injured?**  Yes  No  No response | 1582 | 28  45  9 | 34.1  54.9  11.0 | 268  1112  120 | 17.9  74.1  8.0 | **0.00** | **2.58** |
| **[Q3] [during first 18 years of life] Did an adult or person at least 5 years older than you ever touch or fondle you or have you touch their body in a sexual way? OR try to or actually have oral, anal, or vaginal sex with you?**  Yes  No  No response | 1582 | 26  47  9 | 31.7  57.3  11.0 | 124  1257  119 | 8.3  83.8  7.9 | **0.00** | **5.61** |
| **[Q4] [during first 18 years of life] Did you often feel that no one in your family loved you or thought you were important or special? OR Your family didn't look out for each other, feel close to each other, or support each other?**  Yes  No  No Response | 1582 | 35  38  9 | 46.3  42.7  11.0 | 271  1107  122 | 18.1  73.8  8.1 | **0.00** | **3.76** |
| **[Q5] [during first 18 years of life] Did you often feel that you didn't have enough to eat, had to wear dirty clothes, and had no one to protect you? OR Your parents were too drunk or high to take care of you or take you to the doctor if you needed it?**  Yes  No  No Response | 1582 | 12  60  10 | 14.6  73.2  12.2 | 47  1333  120 | 3.1  88.9  8.0 | **0.00** | **5.67** |
| **[Q6] [during first 18 years of life] Were your parents ever separated or divorced?**  Yes  No  No Response | 1582 | 32  40  10 | 39.0  48.8  12.2 | 372  1008  120 | 24.8  67.2  8.0 | **0.00** | **2.17** |
| **[Q7] [during first 18 years of life] Was your mother or stepmother: often pushed, grabbed, slapped, or had something**  **thrown at her? OR sometimes or often kicked, bitten, hit with a fist, or hit with something hard? OR ever repeatedly hit over at least a few minutes or threatened with a gun or knife?**  Yes  No  No Response | 1582 | 10  63  9 | 12.2  76.8  11.0 | 87  1293  120 | 5.8  86.2  8.0 | **0.01** | **2.36** |
| **[Q8] Did you live with anyone who was a problem drinker or who used street drugs?**  Yes  No  No Response | 1582 | 26  47  9 | 31.7  57.3  11.0 | 166  1214  120 | 11.1  80.9  8.0 | **0.00** | **4.05** |
| **[Q9] Was a household member depressed or mentally ill or did a household member attempt suicide?**  Yes  No  No Response | 1582 | 30  43  9 | 36.6  52.4  11.0 | 352  1025  123 | 23.5  68.3  8.2 | **0.00** | **2.03** |
| **[Q10] Did a household member go to prison?**  Yes  No  No Response | 1582 | 10  62  10 | 12.2  75.6  12.2 | 44  1335  121 | 2.9  89.0  8.1 | **0.00** | **4.89** |
