# Supplementary material for: Undergraduate Students Sugar Dating in the US Demonstrate Increased Financial Need and a History of Several Adverse Childhood Experiences
Source: Research Square preprint supplement (doi:10.21203/rs.3.rs-3171711/v1), 2023-07-20
Supplement: Supplementary file 4 [file f9ee6830e011f7c5ccbe1186.docx]

| **Table 1. Risk Factors/Socio-demographic Characteristics (N=1,582)** | | | | | | |
| --- | --- | --- | --- | --- | --- | --- |
|  | **Exposed** | | **Control** | |  | |
| **Participation in sugar dating as a sugar baby** | 82 | | 1,500 | | **Prevalence: 5.18** | |
|  | **Freq** | **%** | **Freq** | **%** | **p-value** |
| **Age** | n=76  Mean: 20.6  SD: 2.2  Median: 21  Range: 18-28  IQR: 2 |  | n=1,423  Mean: 19.98  SD: 1.5  Median: 20  Range: 18 - 37  IQR: 2 |  | **0.02** |
| **Gender**  Cis Woman  Cis Man  Trans Man  Non-binary  Other  Trans Woman  No Response | 53  16  5  1  1  0  6 | 64.6  19.5  6.1  1.2  1.2  0.0  7.3 | 933  447  7  28  4  2  79 | 62.2  29.8  0.5  1.9  0.3  0.1  5.3 | 0.11  **0.00**  0.65  0.15  0.74 |
| **Sexual Orientation**  Straight/heterosexual  Bisexual  Gay/Lesbian  Other  Not sure/questioning  Prefer not to answer  No Response | 32  25  11  5  3  0  6 | 39.0  30.5  13.4  6.1  3.7  0.0  7.3 | 981  252  106  38  42  4  77 | 65.4  16.8  7.1  2.5  2.8  0.3  5.1 | **0.00**  **0.00**  **0.00**  0.20  0.72 |
| **Race/ethnicity***  White/Caucasian  Asian/Pacific Islander  Multiracial  Hispanic/Latino  Black/African American  Middle Eastern/North African  American Indian/Alaskan  Other  No Response | 29  20  11  9  5  1  1  0  6 | 35.4  24.4  13.4  11.0  6.1  1.2  1.2  0.0  7.3 | 444  489  140  208  107  21  4  5  82 | 29.6  32.6  9.3  13.9  7.1  1.4  0.3  0.3  5.5 | 0.49 |
| **Religion**  Agnostic/Atheist/None  Identifies w/ a Religion  Not Sure  No Response/Prefer not to answer | 42  29  3  8 | 51.2  35.4  3.7  9.8 | 753  567  74  106 | 50.2  37.8  4.9  7.1 | 0.76 |
| **Academic field(s) of major(s)***  Social Sciences  Humanities  Sciences  Mathematics  Engineering  Computer Science  Arts (Music, Theater, Dance, Fine Arts)  Business  Other  Undecided  Prefer Not to Say | 30  26  10  3  5  1  18  8  3  3  1 | 36.6  31.7  12.2  3.7  6.1  1.2  22.0  9.8  3.7  3.7  1.2 | 518  347  306  86  58  141  270  214  82  30  18 | 34.5  23.1  20.4  5.7  3.9  9.4  18.0  14.3  5.5  2.0  1.2 | 0.70  0.08  0.07  0.43  0.31  **0.01**  0.37  0.25  0.48  0.31  0.20 |
| **Either parent’s highest level of education**  None  Elementary School  Middle School  High School or GED  Associate’s degree  Bachelor’s degree  Graduate education  Don’t Know  Prefer not to answer | 0  0  2  5  5  26  35  0  9 | 0.0  0.0  2.4  6.1  6.1  31.7  42.7  0.0  11.0 | 4  3  10  155  61  420  750  8  89 | 0.3  0.2  0.7  10.3  4.1  28.0  50.1  0.5  5.9 | 0.31 |
| **Dating/ Relationship Status**  Single  Monogamous Relationship  Dating (ie. more than one date with someone) one  or more people but not in a relationship  Open Relationship  It’s complicated/not sure  Prefer not to Answer | 20  26  24  7  0  5 | 24.4  31.7  29.3  8.5  0.0  6.1 | 729  465  179  27  2  98 | 48.6  31.0  11.9  1.8  0.1  6.5 | **0.02**  **0.00**  **0.00** |
| **Sexually active in the past year**  Yes  No  Prefer not to answer | 79  1  2 | 96.3  1.2  2.4 | 1054  404  42 | 70.3  26.9  2.8 | **0.00** |
| **Contracted an STI in**  **College**  Yes  No  Prefer not to answer | 13  66  3 | 15.9  80.5  3.7 | 69  1425  6 | 4.6  95.0  0.4 | **0.00** |
| **Method of learning about sugar dating:***  Word of Mouth  I know someone who has sugar dated  Social Media  News/Article  Advertisement  Other  Already Participated or was propositioned to participate  TV/Movie/Netflix  Prefer not to answer | 55  45  41  16  7  5  3  0  0 | 67.1  54.9  50.0  19.5  8.5  6.1  3.7  0.0  0.0 | 1102  521  816  341  84  33  1  21  2 | 73.5  34.8  54.4  22.7  5.6  2.2  0.1  0.8  0.1 | 0.20  **0.00**  0.44  0.50  0.27  **0.03**  **0.00**  0.28  0.74 |
| **Use of dating site/app known to be associated with sugar dating**  Yes  No | 51  31 | 62.2  37.8 | 77  1423 | 5.1  94.9 | **0.00** |
| **Sugar dating sites used:**  Seeking Arrangement  Sugar Daddy Meet  Sugardaddie.com  Arrangement.com**  SugarDaddyforMe.com  Findrichguys.com  Hinge  Tantan  J-Swipe  Scruff | 46  10  4  6  3  3  8  0  0  1 | 56.1  12.2  4.9  7.3  3.7  3.7  9.8  0.0  0.0  1.2 | 70  7  0  1  2  1  195  7  5  2 | 4.7  0.5  0.0  0.1  0.1  0.1  13.0  0.5  0.3  0.1 | **0.00**  **0.00**  **0.00**  **0.00**  **0.00**  **0.00**  0.39  0.54  0.60  **0.03** |
| *Adds up to more than 100% because participants could select more than one option  ** This site no longer exists | | | | | | |
